# Supplementary material for: Short-term survival of acute respiratory distress syndrome patients due to influenza virus infection alone: a cohort study
Source: PubMed Central journal article supplement — ERJ Open Res. 2020 Nov 10;6(4):00587-2020. doi: 10.1183/23120541.00587-2020 (PMC7682721; doi:10.1183/23120541.00587-2020), 2020-11-10
Supplement: 00587-2020.SUPPLEMENT.pdf [file 00587-2020.SUPPLEMENT.pdf]

STROBE Statement—Checklist of items that should be included in reports of *cohort studies*

|                      | Item No |                                                                                                                                                                                                                                                                                                                            | Recommendation                                                                                                                                                                                                                                                                                                                                        |
|----------------------|---------|----------------------------------------------------------------------------------------------------------------------------------------------------------------------------------------------------------------------------------------------------------------------------------------------------------------------------|-------------------------------------------------------------------------------------------------------------------------------------------------------------------------------------------------------------------------------------------------------------------------------------------------------------------------------------------------------|
| Title and abstract   | 1       | (a)                                                                                                                                                                                                                                                                                                                        | Indicate the study’s design with a commonly used term in the title or the abstract                                                                                                                                                                                                                                                                    |
|                      |         | (b)                                                                                                                                                                                                                                                                                                                        | Cohort study                                                                                                                                                                                                                                                                                                                                          |
|                      |         | (b) Provide in the abstract an informative and balanced summary of what was done and what was found                                                                                                                                                                                                                        |                                                                                                                                                                                                                                                                                                                                                       |
| Introduction         |         |                                                                                                                                                                                                                                                                                                                            |                                                                                                                                                                                                                                                                                                                                                       |
| Background/rationale | 2       | Explain the scientific background and rationale for the investigation being reported<br>Influenza virus: major cause of ARDS<br>Influenza virus-related ARDS: particular pathophysiology which can affect the prognosis of ARDS<br>Few published comparisons between ARDS patients whether ARDS is due or not to influenza |                                                                                                                                                                                                                                                                                                                                                       |
| Objectives           | 3       | State specific objectives, including any prespecified hypotheses<br>To compare mortality at day 28 between ARDS due to influenza virus alone with ARDS due to other causes                                                                                                                                                 |                                                                                                                                                                                                                                                                                                                                                       |
| Methods              |         |                                                                                                                                                                                                                                                                                                                            |                                                                                                                                                                                                                                                                                                                                                       |
| Study design         | 4       | Present key elements of study design early in the paper<br>Retrospective analysis of data collected prospectively with no missing data. Comparison of short-term survival on the whole population and after matching process                                                                                               |                                                                                                                                                                                                                                                                                                                                                       |
| Setting              | 5       | Describe the setting, locations, and relevant dates, including periods of recruitment, exposure, follow-up, and data collection<br>Setting: a mixed 21-bed ICU in a university hospital<br>Study period: from October 2009 to March 2020<br>Follow-up period: from diagnosis of ARDS until day 28                          |                                                                                                                                                                                                                                                                                                                                                       |
| Participants         | 6       | (a)                                                                                                                                                                                                                                                                                                                        | Give the eligibility criteria, and the sources and methods of selection of participants.<br><br>Describe methods of follow-up<br>Patients with ARDS and PaO2/FiO2 ratio≤150 mmHg (n= 572)<br>Data base started in 2005<br>Short-term follow-up (day 28)                                                                                               |
|                      |         | (b)                                                                                                                                                                                                                                                                                                                        | For matched studies, give matching criteria and number of exposed and unexposed<br>Matching criteria: age, severity (SAPSII score), year of admission, comorbidities, ARDS severity based on Berlin criteria, treatments (prone positioning, vasopressors and steroids) and organ supports (ECMO and renal replacement)<br>Exposed/non-exposed: 73/73 |

|                              |     |                                                                                                                                                                                                                                                                                                                                                                                                                                                                                                         |
|------------------------------|-----|---------------------------------------------------------------------------------------------------------------------------------------------------------------------------------------------------------------------------------------------------------------------------------------------------------------------------------------------------------------------------------------------------------------------------------------------------------------------------------------------------------|
| Variables                    | 7   | Clearly define all outcomes, exposures, predictors, potential confounders, and effect modifiers. Give diagnostic criteria, if applicable<br>Outcomes and predictors were described and defined; potential confounders discussed.                                                                                                                                                                                                                                                                        |
| Data sources/<br>measurement | 8*  | For each variable of interest, give sources of data and details of methods of assessment (measurement). Describe comparability of assessment methods if there is more than one group<br>Source of data: data base of our ICU<br>Statistical tests used for comparisons were described in the statistical section                                                                                                                                                                                        |
| Bias                         | 9   | Describe any efforts to address potential sources of bias<br>Calculation of the E-value for cohort with variable of interest >15%                                                                                                                                                                                                                                                                                                                                                                       |
| Study size                   | 10  | Explain how the study size was arrived at<br>Study cohort stopped before admission in the ICU of the first patients with Covid 19 infection.                                                                                                                                                                                                                                                                                                                                                            |
| Quantitative variables       | 11  | Explain how quantitative variables were handled in the analyses. If applicable, describe which groupings were chosen and why<br>Comparisons between proportions of patients                                                                                                                                                                                                                                                                                                                             |
| Statistical methods          | 12  | (a) Describe all statistical methods, including those used to control for confounding Made<br>(b) Describe any methods used to examine subgroups and interactions NA<br>(c) Explain how missing data were addressed no missing data<br>(d) If applicable, explain how loss to follow-up was addressed no loss to follow-up<br>(e) Describe any sensitivity analyses calculation of the E-value                                                                                                          |
| <b>Results</b>               |     |                                                                                                                                                                                                                                                                                                                                                                                                                                                                                                         |
| Participants                 | 13* | (a) Report numbers of individuals at each stage of study—eg numbers potentially eligible, examined for eligibility, confirmed eligible, included in the study, completing follow-up, and analysed patients at risk were shown with survival curves<br>(b) Give reasons for non-participation at each stage NA<br>(c) Consider use of a flow diagram we believe not useful in the present study                                                                                                          |
| Descriptive data             | 14* | (a) Give characteristics of study participants (eg demographic, clinical, social) and information on exposures and potential confounders Made<br>(b) Indicate number of participants with missing data for each variable of interest None<br>(c) Summarise follow-up time (eg, average and total amount) 28 days of follow-up                                                                                                                                                                           |
| Outcome data                 | 15* | Report numbers of outcome events or summary measures over time Made in survival analysis                                                                                                                                                                                                                                                                                                                                                                                                                |
| Main results                 | 16  | (a) Give unadjusted estimates and, if applicable, confounder-adjusted estimates and their precision (eg, 95% confidence interval). Make clear which confounders were adjusted for and why they were included Unadjusted and adjusted analyses were performed<br>(b) Report category boundaries when continuous variables were categorized 25ème and 75ème percentiles were provided<br>(c) If relevant, consider translating estimates of relative risk into absolute risk for a meaningful time period |
| Other analyses               | 17  | Report other analyses done—eg analyses of subgroups and interactions, and sensitivity analyses No other subgroup than the matched population                                                                                                                                                                                                                                                                                                                                                            |

|                          |    |                                                                                                                                                                                       |
|--------------------------|----|---------------------------------------------------------------------------------------------------------------------------------------------------------------------------------------|
| <b>Discussion</b>        |    |                                                                                                                                                                                       |
| Key results              | 18 | Summarise key results with reference to study objectives Done in the first paragraph of the discussion section                                                                        |
| Limitations              | 19 | Discuss limitations of the study, taking into account sources of potential bias or imprecision. Discuss both direction and magnitude of any potential bias<br>See limitations section |
| Interpretation           | 20 | Give a cautious overall interpretation of results considering objectives, limitations, multiplicity of analyses, results from similar studies, and other relevant evidence Made       |
| Generalisability         | 21 | Discuss the generalisability (external validity) of the study results discussed among limitations                                                                                     |
| <b>Other information</b> |    |                                                                                                                                                                                       |
| Funding                  | 22 | Give the source of funding and the role of the funders for the present study and, if applicable, for the original study on which the present article is based<br>None                 |

Supplemental table 1a: Ventilator settings, respiratory system mechanics, and results of arterial blood gas measurements recorded on the first three days of mechanical ventilation from the diagnosis of ARDS\*

| Day from ARDS diagnosis                                 | Day 1                 |                         | Day 2                 |                         | Day 3                 |                        |
|---------------------------------------------------------|-----------------------|-------------------------|-----------------------|-------------------------|-----------------------|------------------------|
|                                                         | Influenza virus alone |                         | Influenza virus alone |                         | Influenza virus alone |                        |
|                                                         | Yes                   | No                      | Yes                   | No                      | Yes                   | No                     |
| (number of patients)                                    | (73)                  | (499)                   | (66)                  | (487)                   | (65)                  | (451)                  |
| PEEP, cmH <sub>2</sub> O, median (IQR)                  | 12 (9-14)             | 10 (8-12) <sup>††</sup> | 12 (10-14)            | 10 (8-13) <sup>††</sup> | 12 (10-14)            | 9 (8-12) <sup>††</sup> |
| Driving pressure, cmH <sub>2</sub> O median (IQR)       | 14 (12-16)            | 15 (12-18)              | 13 (10-16)            | 14 (11-17)              | 13 (10-15)            | 14 (11-18)             |
| PaO <sub>2</sub> /FiO <sub>2</sub> , mmHg, median (IQR) | 83 (63-115)           | 90 (68-120)             | 121 (91-157)          | 120 (86-160)            | 137 (102-207)         | 143 (100-201)          |
| PaCO <sub>2</sub> , median (IQR)                        | 55 (46-64)            | 54 (46-65)              | 50 (45-57)            | 49 (42-58)              | 48 (41-53)            | 46 (40-53)             |
| Arterial PH, median (IQR)                               | 7.27 (7.17-7.35)      | 7.25 (7.14-7.34)        | 7.31 (7.22-7.36)      | 7.28 (7.19-7.37)        | 7.34 (7.26-7.40)      | 7.33 (7.24-7.41)       |

\* Using the worst recorded blood gas values and highest values for levels of PEEP, expiratory tidal volume (Vt), plateau pressure and calculated driving pressure.

† Yes vs No,  $p < 0.05$ ; †† Yes vs No,  $p < 0.01$

Definition of abbreviation: Vt, tidal volume; PBW, predicted body weight, IQR; interquartile ranges; FiO<sub>2</sub>, fraction of inspired oxygen; PaCO<sub>2</sub> partial pressure of arterial carbon dioxide; PaO<sub>2</sub> partial pressure of arterial oxygen, PEEP positive end-expiratory pressure.

Supplemental online table 2A. Adjusted hazard ratios (HR) for 28-day mortality from the day of ARDS diagnosis

| Variables <sup>a</sup>                                                        | Adjusted Hazard Ratio<br>(95% CI) | <i>p</i> value |
|-------------------------------------------------------------------------------|-----------------------------------|----------------|
| Influenza virus alone                                                         | 0.51 (0.26-0.99)                  | 0.047          |
| Aspiration                                                                    | 0.75 (0.46-1.23)                  | 0.25           |
| Non-pulmonary sepsis                                                          | 1.60 (1.09-2.43)                  | 0.02           |
| Age (1-year increment)                                                        | 1.020 (1.009-1.032)               | 0.0006         |
| SAPS II at admission (1-point increment)                                      | 1.020 (1.012-1.028)               | <0.0001        |
| Aplasia and/or recent chemotherapy for solid tumor or<br>haematologic disease | 1.39 (0.95-2.05)                  | 0.09           |
| Cirrhosis                                                                     | 2.89 (1.88-4.31)                  | <0.0001        |
| PaO <sub>2</sub> /FiO <sub>2</sub> ratio* (1- mmHg increment)                 | 0.994 (0.989-.0.999)              | 0.02           |
| Driving pressure* (1-point increment)                                         | 1.045 (1.035-1.102)               | <0.0001        |
| Treatment with vasopressors                                                   | 1.06 (0.53-2.15)                  | 0.86           |
| Treatment with glucocorticoids                                                | 1.67 (1.20-2.33)                  | 0.72           |
| Renal replacement therapy                                                     | 2.39 (1.84-3.18)                  | <0.001         |

CI, Confident interval; SAPS, Simplified Acute Physiologic Score; MV, Mechanical Ventilation; SOFA, Sequential Organ Failure Assessment

\* Worst data recorded between 12 and 24 hours of MV from the diagnosis of ARDS, after optimization of MV

Supplemental table 2B. Unadjusted and adjusted hazard ratios for 90-day mortality from the day of ARDS diagnosis

| Variables                                                                     | Unadjusted Hazard Ratio<br>(95% CI) | <i>p</i> Value | Adjusted Hazard Ratio<br>(95% CI) | <i>p</i> Value |
|-------------------------------------------------------------------------------|-------------------------------------|----------------|-----------------------------------|----------------|
| Influenza virus alone                                                         | 0.59 (0.38-0.92)                    | 0.02           | 0.59 (0.35-0.99)                  | 0.048          |
| Influenza virus and co-pathogen                                               | 0.79 (0.43-1.56)                    | 0.79           |                                   |                |
| Non-influenza virus pneumonia                                                 | 1.17 (0.91-1.51)                    | 0.22           |                                   |                |
| Aspiration                                                                    | 0.63 (0.43-0.93)                    | 0.02           |                                   |                |
| Non-pulmonary sepsis                                                          | 1.93 (1.41-2.64)                    | <0.01          | 1.42 (0.98-2.07)                  | 0.06           |
| Miscellaneous                                                                 | 0.98 (0.67-1.44)                    | 0.94           |                                   |                |
| Age (1-year increment)                                                        | 1.024 (1.015-1.032)                 | <0.0001        | 1.018 (1.008-1.029)               | 0.005          |
| Male gender                                                                   | 1.14 (0.88-1.48)                    | 0.32           |                                   |                |
| SAPS II at admission (1-point increment)                                      | 1.029 (1.022-1.035)                 | <0.0001        | 1.017 (1.010-1.024)               | <0.0001        |
| Diabetes mellitus                                                             | 1.13 (0.74-1.78)                    | 0.98           |                                   |                |
| Valvular and/or coronary disease with treatment                               | 1.20 (0.84-1.72)                    | 0.10           |                                   |                |
| Aplasia and/or recent chemotherapy for solid tumor or<br>haematologic disease | 1.95 (1.47-2.58)                    | <0.01          | 1.89 (1.36-2.61)                  | 0.001          |

|                                                              |                     |         |                     |         |
|--------------------------------------------------------------|---------------------|---------|---------------------|---------|
| Cirrhosis                                                    | 1.79 (1.23-2.53)    | <0.0001 | 2.96 (1.99-4.41)    | <0.0001 |
| COPD                                                         | 0.68 (0.49-1.13)    | 0.24    |                     |         |
| Obesity                                                      | 1.07 (0.81-1.43)    | 0.61    |                     |         |
| PaO <sub>2</sub> /FiO <sub>2</sub> ratio* (1-mmHg increment) | 0.992 (0.988-0.996) | <0.0001 | 0.996 (0.991-1.000) | 0.05    |
| Driving pressure* (1-point increment)                        | 1.057 (1.028-1.078) | <0.0001 | 1.070 (1.045-1.095) | <0.001  |
| Treatment with vasopressors                                  | 3.03 (1.65-5.54)    | 0.003   |                     |         |
| Treatment with glucocorticoids                               | 1.68 (1.28-2.20)    | 0.002   |                     |         |
| Renal replacement therapy                                    | 2.08 (1.62-2.67)    | <0.0001 | 1.43 (1.07-1.92)    | 0.02    |
| Prone positioning                                            | 1.02 (0.79-1.32)    | 0.85    |                     |         |
| Extracorporeal membrane oxygenation                          | 1.03 (0.69-1.54)    | 0.87    |                     |         |

---

CI, Confident interval; SAPS, Simplified Acute Physiologic Score; MV, Mechanical Ventilation; SOFA, Sequential Organ Failure Assessment; COPD, chronic obstructive pulmonary disease.

\* Worst data recorded between 12 and 24 hours of MV from the diagnosis of ARDS, after optimization of MV
